# Supplementary material
Source: MDPI journal article supplement (https://www.mdpi.com/2571-550X/5/2/22)
Supplement: s1 [file s1]

Triangular diagrams of sedimentological texture for both cores and their corresponding cumulative particle mass curves created using GRADISTAT statistical package are presented in figures S1 to S8; these include sediment particle size ( $\phi$ ) retained during sieving.

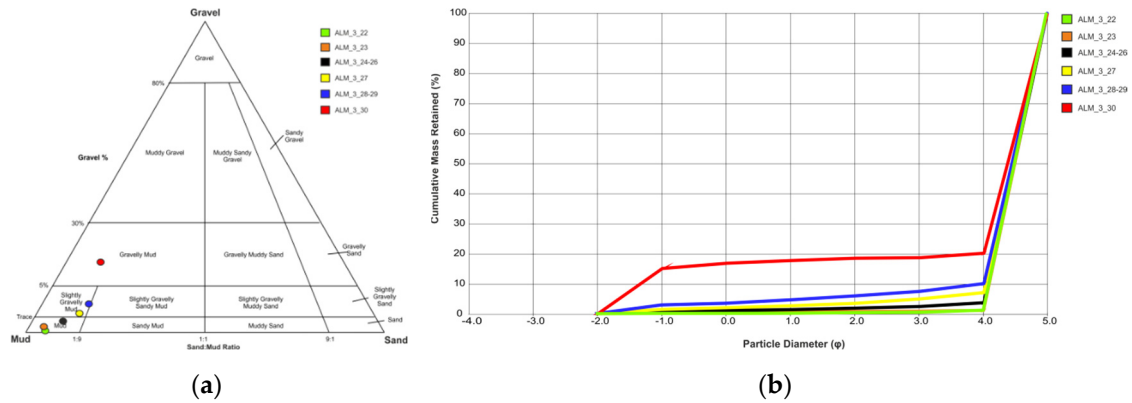

**Figure S1.** GRADISTAT and statistical analysis results of sediment particles of samples 22-30 from ALM3 core: **(a)** Triangular diagram indicating samples texture with different colours; **(b)** Mass cumulative curve of particle diameter. Sediment samples (ALM-3\_30 to 3\_22) were collected from depths of 390 – 308 cm and include Unit A and part of Unit B1 (Unit A: ALM – 3\_30 to 3\_27, Unit B1: ALM – 3\_26 to 3\_22).

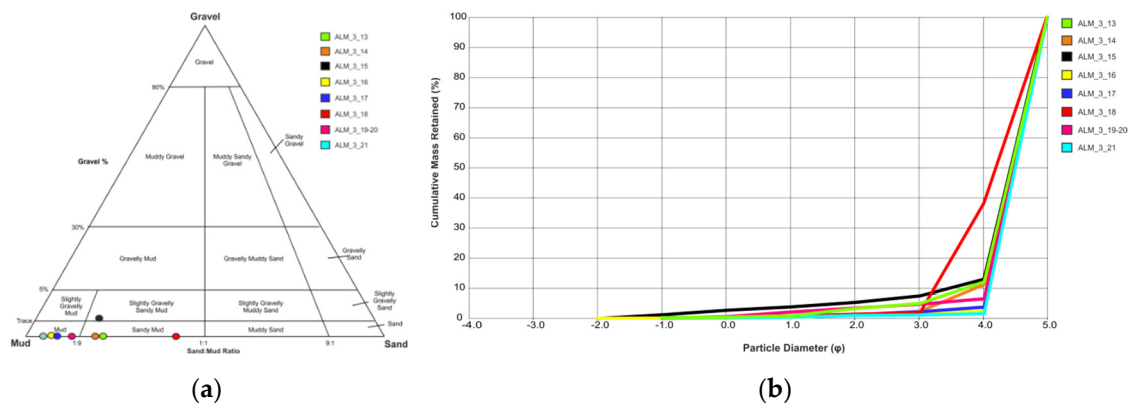

**Figure S2.** GRADISTAT and statistical analysis results of sediment particles of samples 13-21 from ALM3 core: (a) Triangular diagram indicating samples texture with different colours; (b) Mass cumulative curve of particle diameter. Sediment samples (ALM-3\_21 to 3\_13) were collected from depths of 300 – 213 cm and include the rest of Unit B1 and part of Unit B2 (Unit B1: ALM – 3\_21 to 3\_16, Unit B2: ALM – 3\_15 to 3\_13).

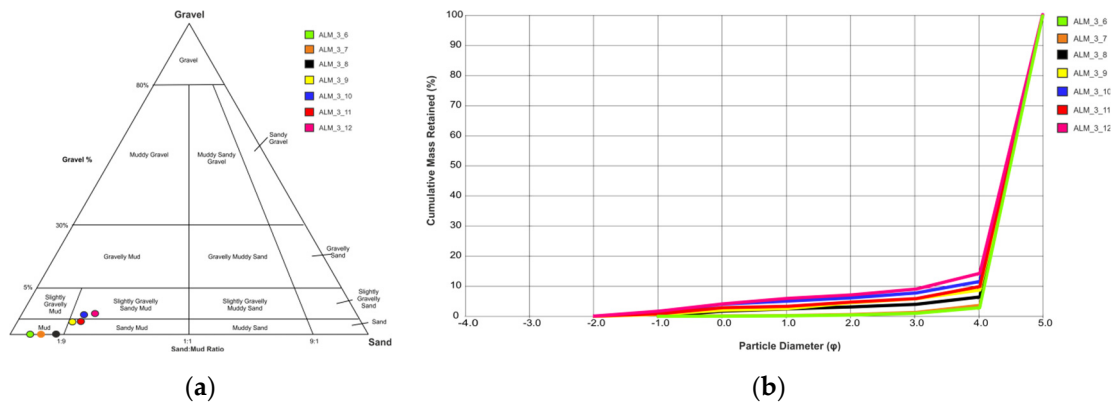

**Figure S3.** GRADISTAT and statistical analysis results of sediment particles of samples 6-12 from ALM3 core: (a) Triangular diagram indicating samples texture with different colours; (b) Mass cumulative curve of particle diameter. Sediment samples (ALM-3\_12 to 3\_6) were collected from depths of 195 – 130 cm and include the rest of Unit B2 and part of Unit C (Unit B2: ALM – 3\_12 to 3\_11, Unit C: ALM – 3\_10 to 3\_6).

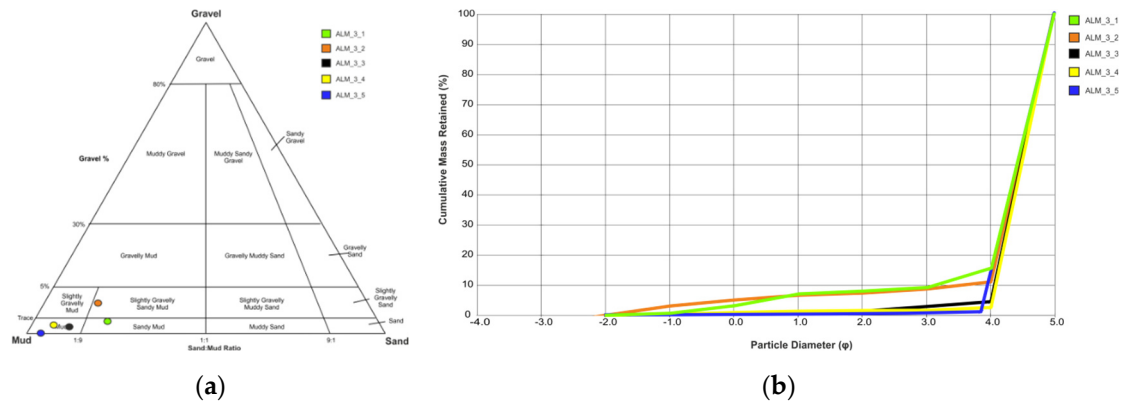

**Figure S4.** GRADISTAT and statistical analysis results of sediment particles of samples 1-5 from ALM3 core: (a) Triangular diagram indicating samples texture with different colours; (b) Mass cumulative curve of particle diameter. Sediment samples (ALM-3\_5 to 3\_1) were collected from depths of 110 – 43 cm and include the rest of Unit C and Unit D (Unit C: ALM – 3\_5, Unit D: ALM – 3\_1 to 3\_4).

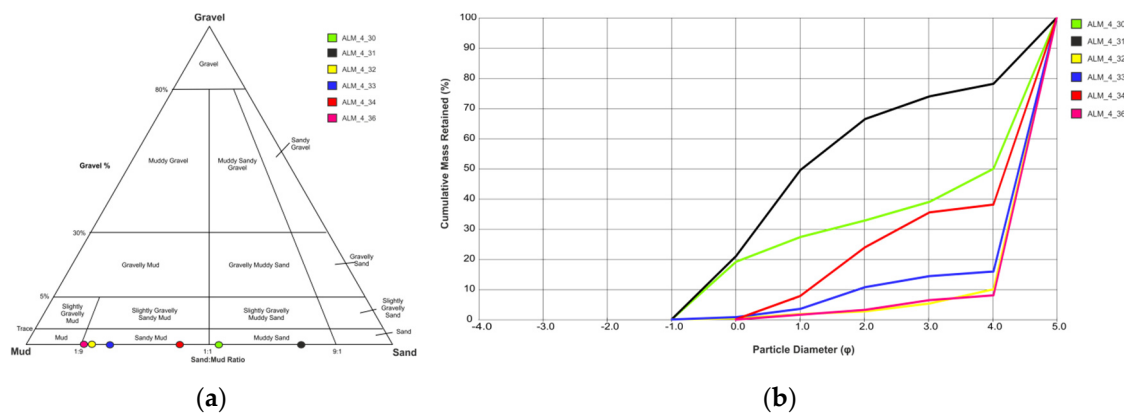

**Figure S5.** GRADISTAT and statistical analysis results of sediment particles of samples 30-36 from ALM4 core: (a) Triangular diagram indicating samples texture with different colours; (b) Mass cumulative curve of particle diameter. Sediment samples (ALM-4\_36 to 4\_30) were collected from depths of 398 – 360 cm and is part of Unit B1.

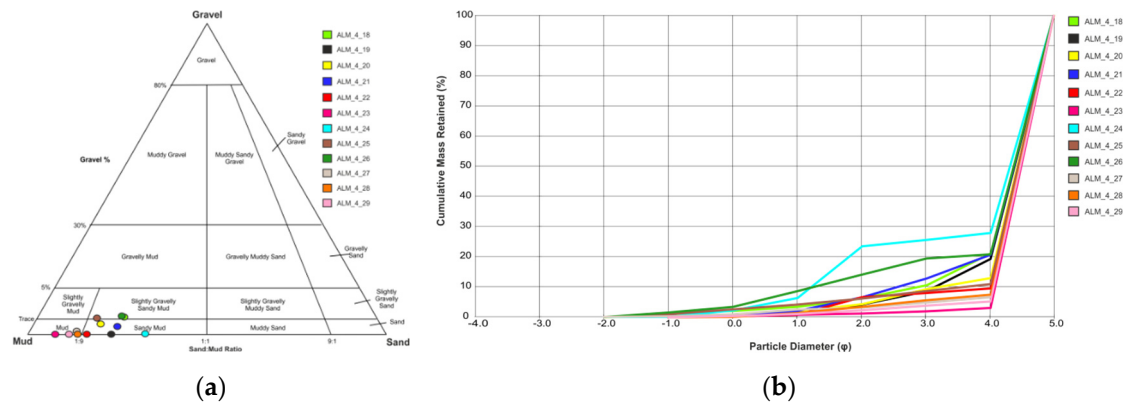

**Figure S6.** GRADISTAT and statistical analysis results of sediment particles of samples 18-29 from ALM4 core: (a) Triangular diagram indicating samples texture with different colours; (b) Mass cumulative curve of particle diameter. Sediment samples (ALM-4\_29 to 4\_18) were collected from depths of 292 – 203 cm and include the rest of Unit B1 and part of Unit B2 (Unit B1: ALM – 4\_29 to 3\_21, Unit B1: ALM – 4\_20 to 4\_18).

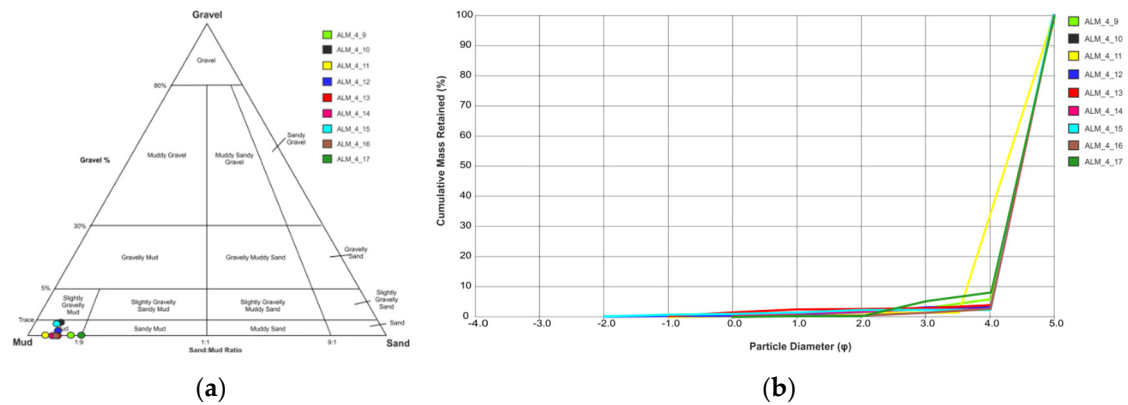

**Figure S7.** GRADISTAT and statistical analysis results of sediment particles of samples 9-17 from ALM4 core: (a) Triangular diagram indicating samples texture with different colours; (b) Mass cumulative curve of particle diameter. Sediment samples (ALM-4\_17 to 4\_9) were collected from depths of 198 – 109 cm and include the rest of Unit B2 and part of Unit C (Unit B2: ALM – 4\_17, Unit C: ALM – 4\_16 to 4\_9).

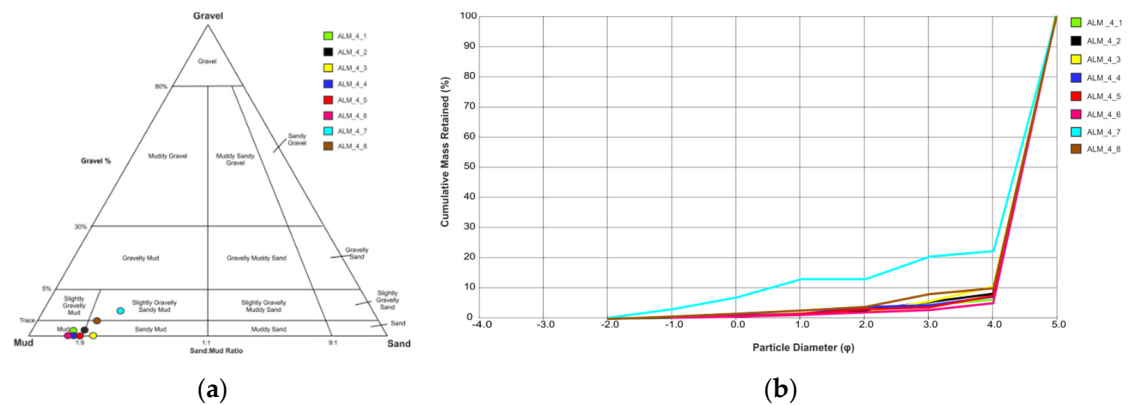

**Figure S8.** GRADISTAT and statistical analysis results of sediment particles of samples 1-8 from ALM4 core: (a) Triangular diagram indicating samples texture with different colours; (b) Mass cumulative curve of particle diameter. Sediment samples (ALM-4\_8 to 4\_1) were collected from depths of 96 – 10 cm and include the rest of Unit C and Unit D (Unit C: ALM – 4\_8 to 4\_4, Unit D: ALM – 4\_3 to 4\_1).
