# Supplementary material
Source: MDPI journal article supplement (https://www.mdpi.com/2571-550X/5/2/22)
Supplement: s1 [file s1]

Archive with 3 entries (3 files):
- Figures S1¿CS8_Sediment classification.pdf
- Table S1_Data_Matrix.xlsx
- Table S2_Pollen_Data.xlsx
