# Supplementary material
Source: MDPI journal article supplement (https://www.mdpi.com/2571-550X/5/2/22)
Supplement: s1 [file s1 › Table S2_Pollen_Data.xlsx]

## Sheet: Sheet1
Sample number	1	2	3	4	5	6	7	8	9	10	11	12	13	14	15	16
Pinus	34	28	23	27	32	24	22	22	18	23	24	21	23	24	25	22
Juniperus	1	1	2	1	0	0	0	0	0	0	1	1	1	0	0	0
Quercus pubescens	8	16	24	31	29	21	22	35	26	23	24	22	26	25	22	23
Quercus coccifera/ilex	10	20	15	13	11	12	13	9	7	11	9	8	7	6	4	5
Carpinus orientalis	3	4	6	7	6	5	4	8	6	3	2	2	3	3	2	3
Corylus	1	3	2	4	6	4	5	2	2	0	1	2	2	1	1	8
Ostrya	3	2	2	3	3	2	2	2	2	1	0	1	1	2	3	0
Tilia	1	1	1	2	2	2	0	2	1	0	1	1	0	0	0	0
Jugulans	2	4	3	2	4	3	2	4	4	3	2	3	2	3	2	3
Betula	0	2	1	2	2	3	3	2	1	0	1	2	2	2	1	1
Alnus	2	1	1	2	3	2	2	1	1	1	1	1	1	2	1	0
Fagus	1	2	3	2	3	3	2	2	1	1	1	1	2	3	2	1
Salix	0	1	1	2	2	1	1	1	1	0	1	0	0	0	0	0
Olea - type	2	2	12	10	8	9	8	14	9	12	13	9	10	8	9	7
Pistacia type	4	3	6	5	5	4	3	4	3	3	2	4	5	4	3	2
Phillyrea	1	2	3	4	4	3	2	3	3	4	2	3	3	2	3	2
Cistus	2	3	2	2	3	4	4	1	2	1	1	1	1	1	1	1
Platanus	3	3	2	3	4	3	2	2	2	1	2	1	2	2	2	2
Acer	2	1	1	2	3	2	2	1	2	1	1	1	2	3	2	3
Hedera	4	3	1	3	4	2	3	1	1	0	0	0	0	0	0	0
Buxus	3	2	3	2	3	3	2	0	2	1	1	2	1	1	1	1
Vitis	2	3	3	2	2	3	2	3	3	2	1	2	1	2	1	1
Hedera	2	2	3	2	3	2	1	2	1	1	1	1	0	1	2	2
Fraxinus excelcior	2	3	4	4	2	3	2	2	2	2	1	1	0	0	0	0
Cistaceae	3	3	2	2	3	3	2	1	2	2	1	1	1	2	1	1
Populus	1	0	1	2	1	0	0	0	0	0	0	0	0	0	0	0
Graminae	30	25	32	28	30	26	27	33	30	28	26	30	27	25	24	26
Compositae	18	20	22	24	27	23	22	20	23	18	17	15	16	17	15	13
Plantago lanceolata	6	5	7	6	5	4	3	4	4	3	2	3	2	3	2	1
Artemisia	2	4	3	4	7	3	4	2	2	3	2	3	3	2	1	3
Amaranthaceae/Chenopodiaceae	22	18	16	15	11	18	14	13	12	14	12	11	14	12	11	13
Ephedra distachya	4	5	4	3	5	3	4	2	2	2	1	2	2	3	2	2
Sparganium	22	26	12	11	10	18	12	12	10	9	5	4	5	3	2	3
Typhaceae	9	8	6	5	5	4	4	14	11	8	9	7	6	5	4	3
Cyperaceae	120	106	98	97	88	78	68	65	83	91	88	87	86	69	86	92
Nymphaceae	5	6	5	4	3	4	3	4	3	3	4	4	3	2	2	3
Polygonum	2	3	4	5	3	3	2	2	4	2	3	3	2	1	1	1
Ovoidites elongatus	5	7	6	8	10	8	7	11	12	10	11	10	12	13	12	10
Other herbaceous pollen	67	65	56	54	62	52	55	57	57	52	53	56	54	52	53	48
Total non arboreal pollen	312	298	271	264	266	244	225	239	253	243	233	235	232	207	215	218
Total Pteridophytes	27	23	18	16	14	12	11	9	11	9	7	8	7	6	6	5
Cool temperate evergreen	8	6	8	7	6	5	3	3	3	2	3	4	2	2	3	3
Cool temperate summergreen	16	29	38	50	51	38	38	22	38	31	32	31	37	35	29	36
Warm temperate summergreen	15	18	17	20	21	19	16	15	16	10	9	9	9	12	12	11
Warm temperate sclerophyllous	19	30	38	34	31	32	30	31	24	31	27	25	26	21	20	17
Sum Trees (Pinus excluded)	46	69	88	97	98	83	77	93	73	65	65	63	70	67	58	54

## Sheet: Sheet2
Samples/Depth (cm)	Pinus	Juniperus	Quercus pubescens	Quercus coccifera/ilex	Carpinus orientalis	Corylus	Ostrya	Tilia	Jugulans	Betula	Alnus	Fagus	Salix	Olea type	Pistacia type	Phillyrea	Cistus	Platanus	Acer	Hedera	Buxus	Vitis	Hedera	Fraxinus excelcior	Cistaceae	Populus
1	34	1	8	10	3	1	3	1	2	0	2	1	0	2	4	1	2	3	2	4	3	2	2	2	3	1
2	28	1	16	20	4	3	2	1	4	2	1	2	1	2	3	2	3	3	1	3	2	3	2	3	3	0
3	23	2	24	15	6	2	2	1	3	1	1	3	1	12	6	3	2	2	1	1	3	3	3	4	2	1
4	27	1	31	13	7	4	3	2	2	2	2	2	2	10	5	4	2	3	2	3	2	2	2	4	2	2
5	32	0	29	11	6	6	3	2	4	2	3	3	2	8	5	4	3	4	3	4	3	2	3	2	3	1
6	24	0	21	12	5	4	2	2	3	3	2	3	1	9	4	3	4	3	2	2	3	3	2	3	3	0
7	22	0	22	13	4	5	2	0	2	3	2	2	1	8	3	2	4	2	2	3	2	2	1	2	2	0
8	22	0	35	9	8	2	2	2	4	2	1	2	1	14	4	3	1	2	1	1	0	3	2	2	1	0
9	18	0	26	7	6	2	2	1	4	1	1	1	1	9	3	3	2	2	2	1	2	3	1	2	2	0
10	23	0	23	11	3	0	1	0	3	0	1	1	0	12	3	4	1	1	1	0	1	2	1	2	2	0
11	24	1	24	9	2	1	0	1	2	1	1	1	1	13	2	2	1	2	1	0	1	1	1	1	1	0
12	21	1	22	8	2	2	1	1	3	2	1	1	0	9	4	3	1	1	1	0	2	2	1	1	1	0
13	23	1	26	7	3	2	1	0	2	2	1	2	0	10	5	3	1	2	2	0	1	1	0	0	1	0
14	24	0	25	6	3	1	2	0	3	2	2	3	0	8	4	2	1	2	3	0	1	2	1	0	2	0
15	25	0	22	4	2	1	3	0	2	1	1	2	0	9	3	3	1	2	2	0	1	1	2	0	1	0
16	22	0	23	5	3	8	0	0	3	1	0	1	0	7	2	2	1	2	3	0	1	1	2	0	1	0
